# Supplementary material for: Facile synthesis of size-controlled Fe2O3 nanoparticle-decorated carbon nanotubes for highly sensitive H2S detection
Source: Royal Society of Chemistry journal article supplement (doi:10.1039/c8ra06464d), 2018-01-01
Supplement: c8ra06464d1.pdf [file c8ra06464d1.pdf]

Electronic Supplementary Information (ESI) for

## **Facile synthesis of size-controlled Fe<sub>2</sub>O<sub>3</sub> nanoparticle-decorated carbon nanotubes for highly sensitive H<sub>2</sub>S detection**

Wooyoung Kim<sup>a</sup>, Jun Seop Lee<sup>b\*</sup> and Jyongsik Jang<sup>a\*</sup>

<sup>a</sup> School of Chemical and Biological Engineering, College of Engineering, Seoul National University, 599 Gwanangno, Gwanakgu, Seoul, 151-742 (Korea),

<sup>b</sup> Department of Nanochemistry, College of Bionano, Gachon University, 1342 Seongnamdaero, Sujeong-gu, Seongnam-Si, Gyeonggi-Do, 13120 (Korea)

Corresponding Author:

\*E-mail: (J. Jang) [jsjang@plaza.snu.ac.kr](mailto:jsjang@plaza.snu.ac.kr); Tel.: +82-2-880-7069; Fax: +82-2-880-1604

\*E-mail: (J.S. Lee) [junseop@gachon.ac.kr](mailto:junseop@gachon.ac.kr); Tel.: +82-31-750-5814; Fax: +82-31-750-5389

## 1. Raman spectra of nanocomposites

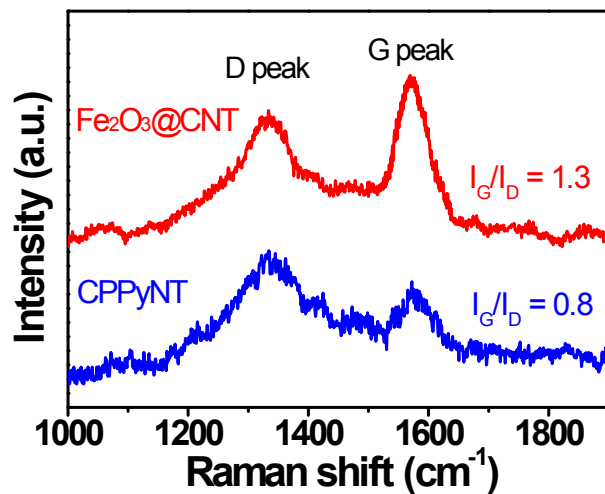

**Figure S1.** Raman spectra for the CPPyNT (blue) and the Fe<sub>2</sub>O<sub>3</sub>@CNT (red).

## 2. Sensing ability of nanocomposites

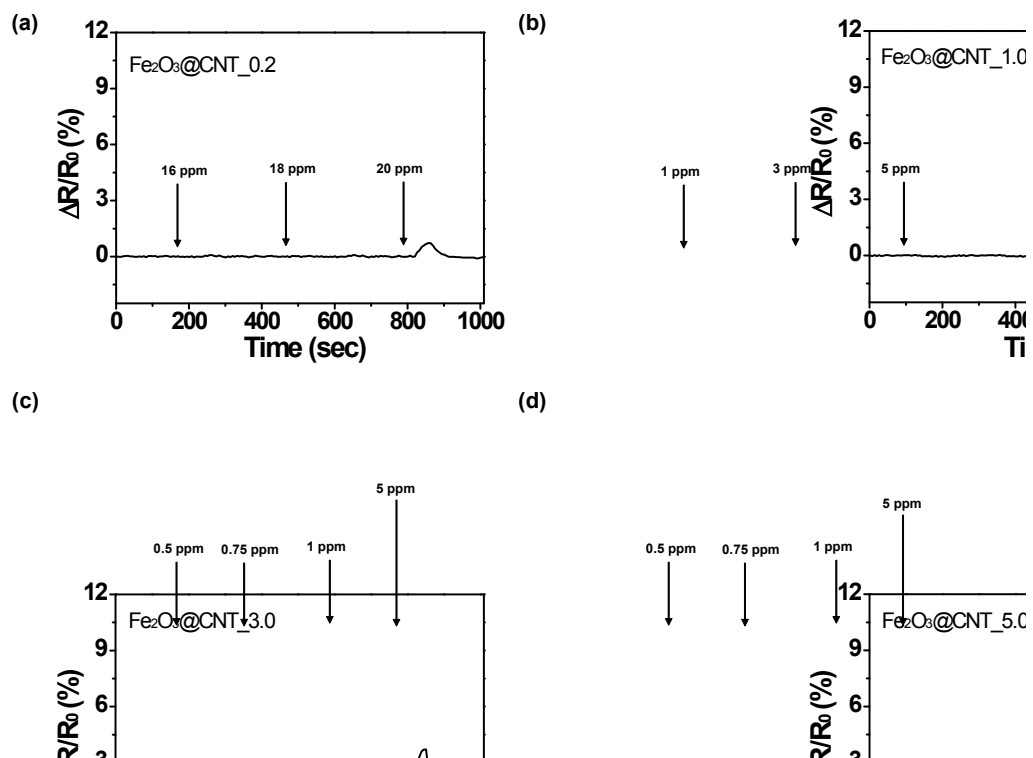

**Figure S2.** Normalized resistance changes upon sequential exposure to various concentrations of H<sub>2</sub>S: (a) Fe<sub>2</sub>O<sub>3</sub>@CNT\_0.2; (b) Fe<sub>2</sub>O<sub>3</sub>@CNT\_1.0; (c) Fe<sub>2</sub>O<sub>3</sub>@CNT\_3.0; (d) Fe<sub>2</sub>O<sub>3</sub>@CNT\_5.0.

### 3. Comparison H<sub>2</sub>S sensing performance of different chemical sensors

**Table S1.** Summary of representative sensor for H<sub>2</sub>S detection.

| Sensing material                                          | Sensing signal    | Working temperature | Limit of detection | Reference |
|-----------------------------------------------------------|-------------------|---------------------|--------------------|-----------|
| CuFe <sub>2</sub> O <sub>4</sub> nanoparticle             | Current           | 200°C               | 25 ppm             | [S1]      |
| $\alpha$ -Fe <sub>2</sub> O <sub>3</sub> nanochain        | Resistance        | 285°C               | 1 ppm              | [S2]      |
| $\alpha$ -Fe <sub>2</sub> O <sub>3</sub> nanotube         | Chemiluminescence | 134°C               | 22 ppm             | [S3]      |
| Fe <sub>2</sub> O <sub>3</sub> /graphene                  | Chemiluminescence | 190°C               | 15 ppm             | [S4]      |
| Ag/ $\alpha$ -Fe <sub>2</sub> O <sub>3</sub> nanoparticle | Resistance        | 160°C               | 50 ppm             | [S5]      |
| Fe <sub>2</sub> O <sub>3</sub> @CNT_3                     | Resistance        | 25°C                | 1 ppm              | This work |

[S1] *Appl. Phys. A* 2017, **123**, 682-690.

[S2] *Nanoscale* 2013, **5**, 895-898.

[S3] *Adv. Mater.* 2005, **17**, 2993-2997.

[S4] *J. Mater. Chem. A* 2014, **2**, 6714-6714.

[S5] *Sens. Actuator B-Chem.* 2008, **131**, 183-189.

#### 4. Stability test to H<sub>2</sub>S gas

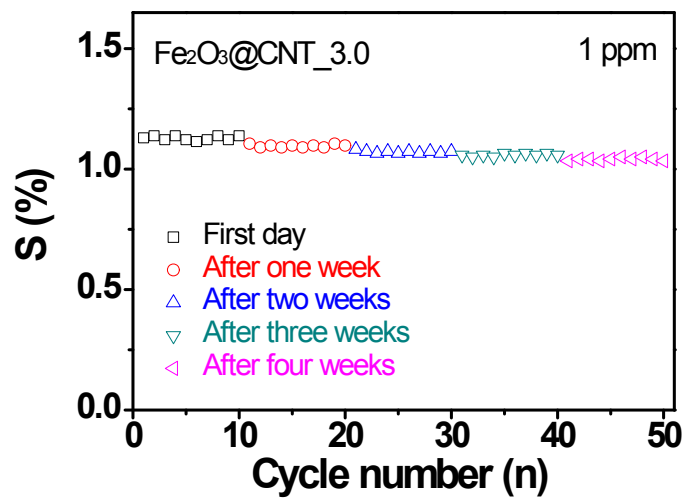

**Figure S3.** Cycle stability of the Fe<sub>2</sub>O<sub>3</sub>@CNT\_3.0 to H<sub>2</sub>S gas.
